# Supplementary material for: SperoPredictor: An Integrated Machine Learning and Molecular Docking-Based Drug Repurposing Framework With Use Case of COVID-19
Source: Frontiers journal article supplement (doi:10.3389/fpubh.2022.902123), 2022-06-16
Supplement: Data_Sheet_1.pdf [file Data_Sheet_1.pdf]

## Supplementary Figures

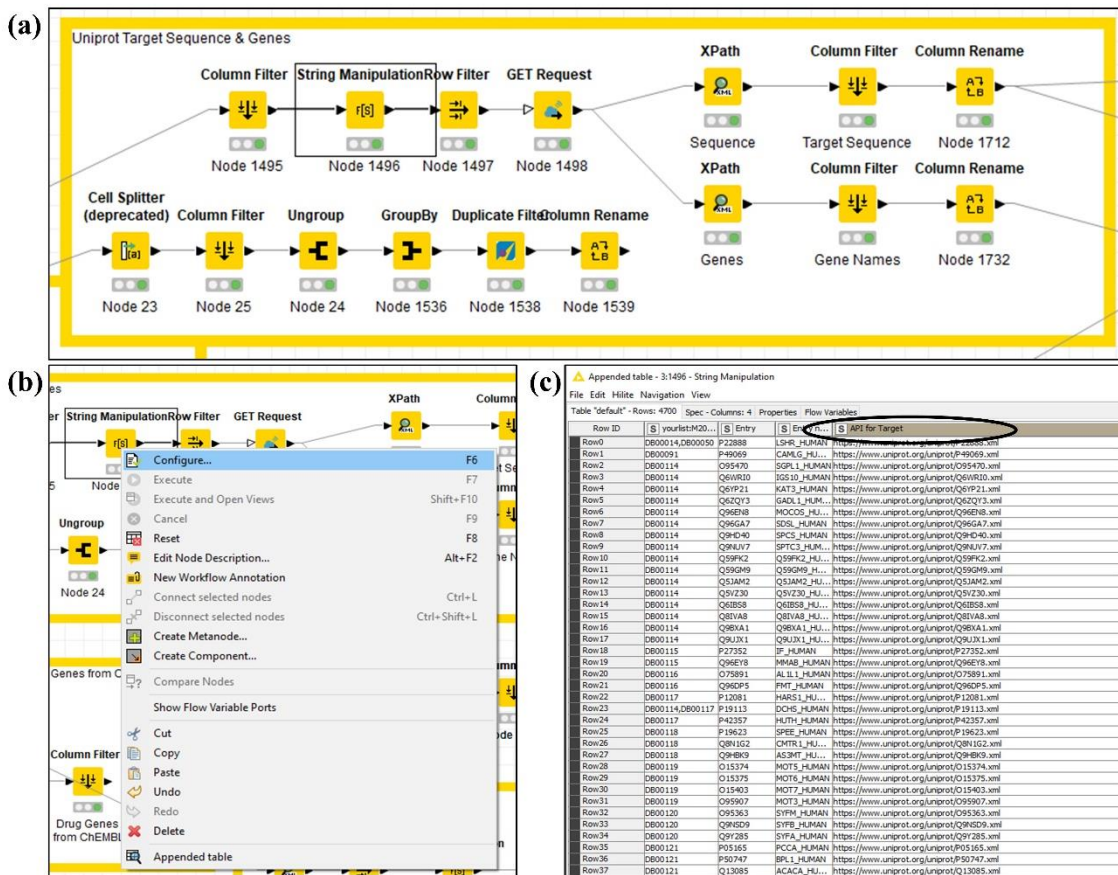

**Fig. S1.** Shows the process of data accession in KNIME environment a) The protein sequence data is accessed from the Uniprot using the API request made through the String Manipulation node to create the reference links followed by the Get Request node to fetch the data, b) and the setting for the link creation in the String Manipulation node is done in the configuration window, finally c) the created API links for the given targets are shown.

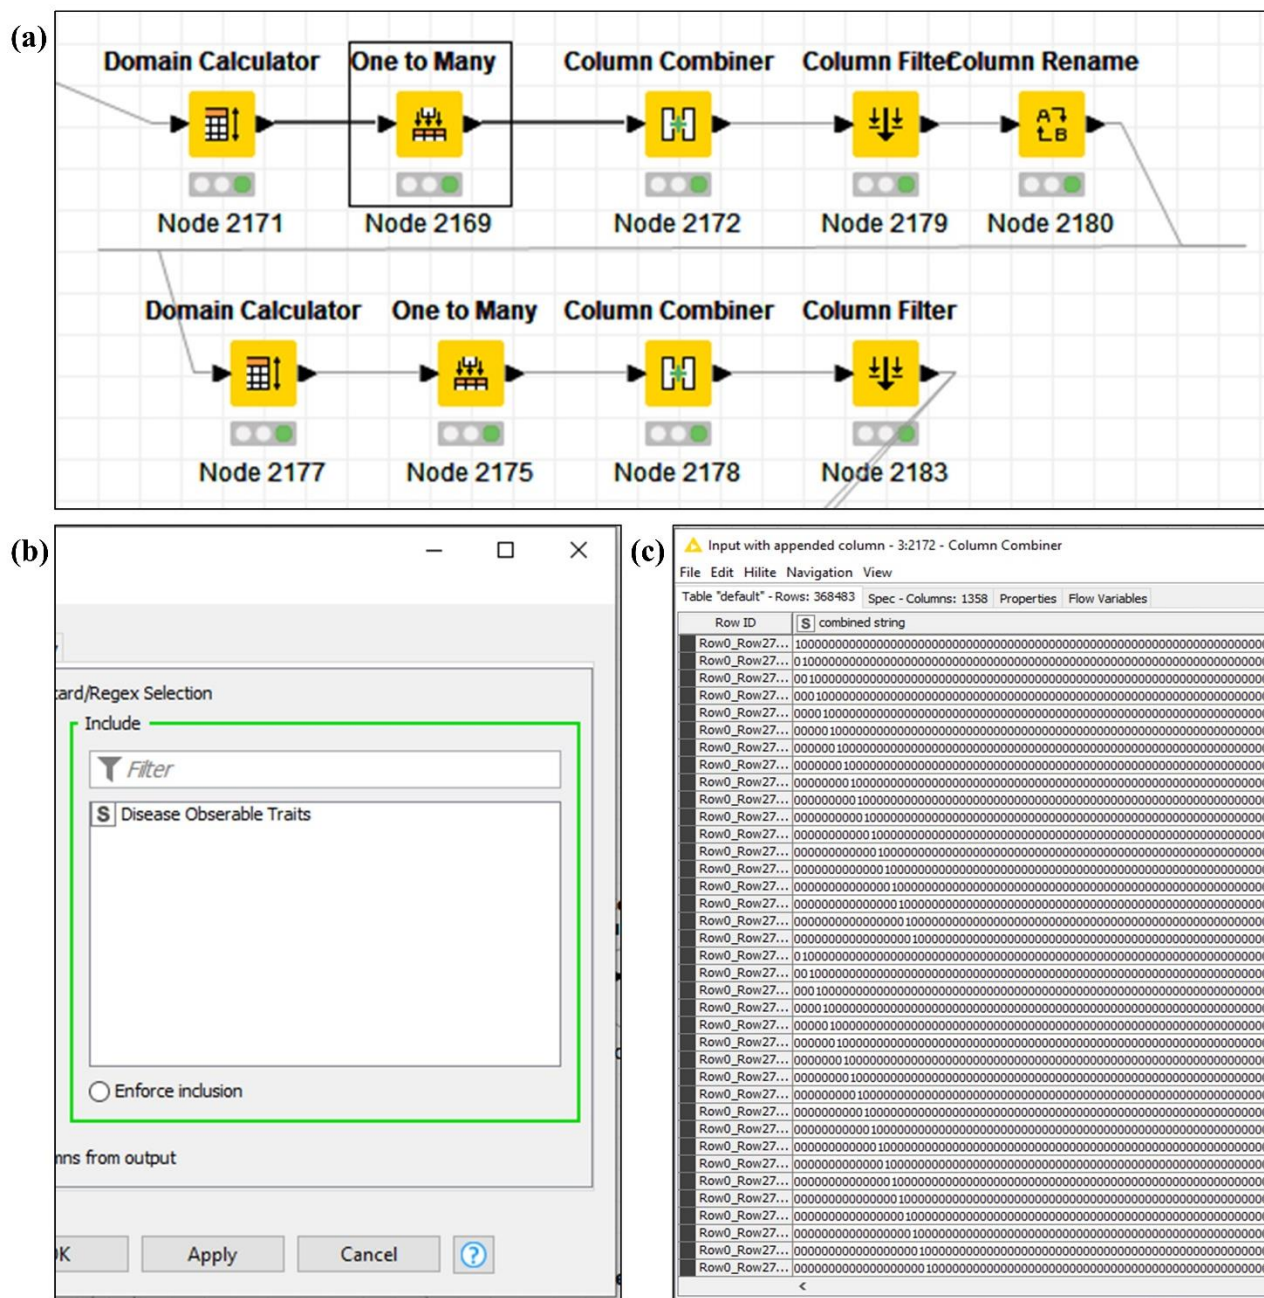

**Fig. S2.** It shows the one-hot encoding and column combination of the disease observable traits moreover a) to convert the data from textual form to one-hot encoded form One-to-Many node in KNIME Analytics Platform is used. It converts the textual data into string of 0s and 1s followed by the column combiner, b) shows the configuration box of the One-to-Many node where the options for selecting or deselecting the data column, c) and finally the One-hot-encoded combined data in the form of 0s and 1s is shown.





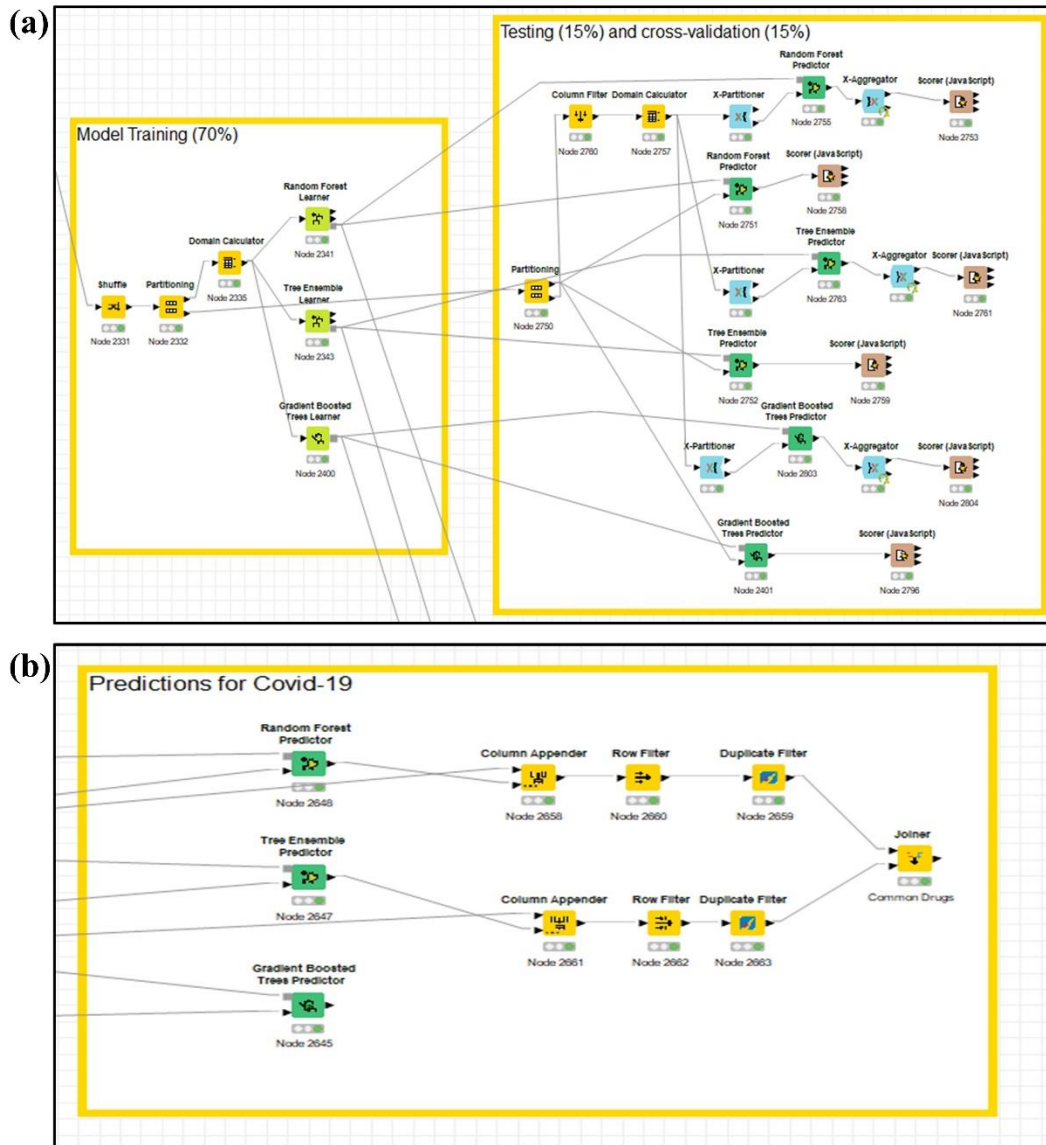

**Fig. S4** RF, TE, and GB model training, testing, validation, and predictions setup where a) shows the Model training for the RF, TE, and GB with 70% of the dataset. Target shuffling is performed followed by the data partitioning which is then individually fed to these machine learning models. After training, the models are tested and cross-validated with remaining 30% of the dataset, which is again split into two portions, each of 15%. The testing is performed with 15% along with 10-fold cross validation. b) After the testing and validation is done, the predictions for the Covid-19 are taken by deploying these models. The data is already prepared and the workflow for the data preparation is shown in Fig. S3. The predictions for the confidence range of 0.9 – 1.0 are then further evaluated.
