# Supplementary material for: SperoPredictor: An Integrated Machine Learning and Molecular Docking-Based Drug Repurposing Framework With Use Case of COVID-19
Source: PubMed Central journal article supplement (PMC9244710; doi:10.3389/fpubh.2022.902123), 2022-06-16
Supplement: Table_5.pdf [file Table_5.pdf]

**Table S5.** Showing the way data is collected for pre-processing and then feeding the machine learning models. The Uniprot IDs and Ensembl IDs are collected from the Uniprot along with gene names. Additionally, the DSI values are collected from DisGeNET database and phenotypes are collected from the Monarch database.

|   | Uniprot ID | Entry Name  | Gene names             | Ensembl ID      | DSI   | Phenotypes                                                                                                                                                                                                          |
|---|------------|-------------|------------------------|-----------------|-------|---------------------------------------------------------------------------------------------------------------------------------------------------------------------------------------------------------------------|
| 1 | O15393     | TMPS2_HUMAN | TMPRSS2, PRSS10        | ENSG00000184012 | 0.5   | 3-hydroxypropylmercapturic acid measurement, smoking behavior                                                                                                                                                       |
| 2 | P07711     | CATL1_HUMAN | CTSL CTSL1             | ENSG00000135047 | 0.488 | cathepsin L1 measurement                                                                                                                                                                                            |
| 3 | P09958     | FURIN_HUMAN | FURIN FUR, PACE, PCSK3 | ENSG00000140564 | 0.612 | prenatal longevity, mean arterial pressure, systolic blood pressure, neutrophil count, balding measurement, risk-taking behavior, diastolic blood pressure, healthspan, age at first sexual intercourse measurement |
| 4 | Q9BYF1     | ACE2_HUMAN  | ACE2, UNQ868, PRO1885  | ENSG00000130234 | 0.477 | increased cell size, cell separation defects and abnormal colony shape                                                                                                                                              |
| 5 | Q2M2I8     | AAK1_HUMAN  | AAK1, KIAA1048         | ENSG00000115977 | 0.792 | hemoglobin measurement, urate measurement, body height, thyroid stimulating hormone measurement                                                                                                                     |
| 6 | O14976     | GAK_HUMAN   | GAK                    | ENSG00000178950 | 0.53  | sepsis, mortality, high density lipoprotein cholesterol measurement, response to vaccine                                                                                                                            |
